# Influence of isolation by environment and landscape heterogeneity on genetic structure of wild rice *Zizania latifolia* along a latitudinal gradient

1 Godfrey Kinyori Wagutu<sup>1,2,3</sup>, Xiangrong Fan<sup>1,4,5</sup>, Wenlong Fu<sup>1,2</sup>, Wei Li<sup>1</sup>, Yuanyuan Chen<sup>1\*</sup>

2 <sup>1</sup>Key Laboratory of Aquatic Botany and Watershed Ecology, Wuhan Botanical Garden, Chinese  
3 Academy of Sciences, Wuhan, China

4 <sup>2</sup>University of Chinese Academy of Sciences, Beijing, China

5 <sup>3</sup>Sino-Africa Joint Research Center, Chinese Academy of Sciences, Wuhan, China

6 <sup>4</sup>College of Science, Tibet University, Lhasa, Tibet Autonomous Region, China

7 <sup>5</sup>Research Center for Ecology and Environment of Qinghai-Tibetan Plateau, Tibet University, Lhasa,  
8 Tibet Autonomous Region, China

9 \* **Correspondence:**

10 Yuanyuan Chen  
11 [yychen@wbgcas.cn](mailto:yychen@wbgcas.cn)

12 **Keywords:** genetic structure, isolation by environment, landscape heterogeneity, latitudinal  
13 gradient, microsatellite markers, *Zizania latifolia*

## 14 Abstract

15 Global aquatic habitats are undergoing rapid degradation and fragmentation as a result of land-use  
16 change and climate change. Understanding the genetic variability and adaptive potential of aquatic  
17 plant species is thus important for conservation purposes. In this study, we investigated the role of  
18 environment, landscape heterogeneity and geographical distance in shaping the genetic structure of  
19 28 natural populations of *Zizania latifolia* (Griseb.) Turcz. Ex Stapf in China based on 25  
20 microsatellite markers. Genetic structure was investigated by analysis of molecular variance  
21 (AMOVA), estimation of  $F_{ST}$ , Bayesian clustering and Thermodynamic Integration (TI) methods.  
22 Isolation by environment (IBE), isolation by resistance (IBR) and isolation by distance (IBD)  
23 hypotheses were compared using a reciprocal causal model (RCM). Further, generalized linear  
24 models and spatially explicit mixed models, by using geographic, landscape and genetic variables,  
25 were developed to elucidate the role of environment in driving *Z. latifolia* genetic diversity. The  
26 genetic differentiation across all populations was high:  $F_{ST} = 0.579$ ;  $\Phi_{pt} = 0.578$ . RCM exclusively  
27 supported IBE in shaping genetic structuring, only partial support for IBR, but not for IBD.  
28 Maximum temperature of the warmest month and precipitation seasonality were the plausible  
29 parameters responsible for genetic diversity. After controlling for spatial effect and landscape  
30 complexity, precipitation seasonality was significantly associated with genetic diversity. Based on  
31 these findings, genetic structure of *Z. latifolia* across China seem to be as a result of local adaptation.  
32 Environmental gradient and topographical barriers, rather than geographical isolation, influence  
33 genetic differentiation of aquatic species across China resulting in instances of local adaptation.

## 35 1 INTRODUCTION

36 Species adaptation to the changing environment mainly depend on the level of standing  
37 genetic variation in the populations (Lande and Shannon, 1996; Bell and Collins, 2008). Gene flow  
38 patterns, one of the factors influencing genetic variability, are affected by the movement of gametes,  
39 individuals and groups of individuals under the influence of landscape features (Sork et al, 1999).  
40 This further impacts the spatiotemporal patterns of genetic structure and evolution of natural  
41 populations (Slatkin, 1985). Climate and land-use changes are the major drivers of environmental  
42 alterations. For instance, global warming has led to temperature and precipitation fluctuations with  
43 instances of extreme episodes (Grant et al., 2017; Marrot et al., 2017), which result in plant  
44 populations' selective pressure (Hoffmann and Sgrò, 2011; Cao et al., 2015). On the other hand,  
45 increase in human population has resulted in rapid conversion of natural lands to farmlands, urban  
46 and industrial areas leading to habitat loss and fragmentation (Zhao et al., 2013; Davidson, 2014).  
47 The overall effect is decline in population size of native species, which is the initial stage of species  
48 local disappearance and eventual extinction (An et al., 2007; Qin, 2008; Halley et al., 2016; Pykälä,  
49 2019). Habitat degradation has profound effects particularly on aquatic plants that live in fragmented  
50 islands within the terrestrial landscapes. Additionally, most aquatic plants persist as meta-  
51 populations, the long-term survival of which depends on continuous gene flow among populations  
52 (Barrett et al., 1993; Santamaría, 2002). Therefore, clear understanding of genetic variability of  
53 aquatic plant species occurring across a large spatial scale is important for estimation of the current  
54 vigor under the different abiotic and biotic conditions and hence the potential to adapt to the  
55 changing environment (Catullo et al., 2019). Knowledge about the major drivers of gene flow is  
56 important for the conservation and management of aquatic plants.

57 The rapid emergence and multidisciplinary nature of landscape genetics has introduced  
58 several hypotheses that assess the relationship between spatially explicit landscape variables and  
59 genetic measures (Manel and Holderegger, 2013; Hall and Beissinger, 2014). This is in an effort to  
60 understand whether dynamic landscape complexities limit gene flow thus resulting in discrete  
61 population structure (isolation by barrier, IBR), or clinal population structure is as a result of  
62 isolation by distance (IBD) and/or isolation by environment (IBE) (Meirmans, 2012; Landguth and  
63 Schwartz, 2014). Clustering of individuals in natural populations could be due to IBD, IBE, IBR or a  
64 combination of either (Cushman et al. 2006; Andrews, 2010; Wang and Bradburd, 2014; van Strien  
65 et al., 2015). IBD pattern results from geographical isolation, which limits gene flow and promotes  
66 genetic drift (Wright, 1943). This model assumes that genetic structure is driven by the linear  
67 relationship between geographic distance and genetic distance. It disregards the effects of nonlinear  
68 complex landscapes, environmental variables and historical processes that influence gene flow  
69 (Jenkins et al., 2010). IBR model considers landscape features and historical processes in explaining  
70 the impediment to gene flow (McRae, 2006). Both IBD and IBR are concerned with the limitations to  
71 the dispersal of gametes, but fails to accommodate the effects of environmental variables. Moreover,  
72 discrete population structure can be misinterpreted as an IBD or IBR pattern, and this may confound  
73 identification of environmental contributions resulting in overestimation of population clustering  
74 (Tucker et al., 2014). In contrast, IBE considers the contribution of environmental heterogeneity in  
75 shaping the distributions of spatial genetic variation independent of geographical isolation (Wang and  
76 Bradburd, 2014). Most empirical research on population genetics has focused on gene flow and  
77 genetic drift as drivers of genetic structure ignoring environmental-driven natural selection (Orsini et  
78 al., 2013). Understanding the environmental variables shaping genetic variation in natural  
79 populations is, therefore, important in evolutionary studies and thus environmental gradients should be  
80 quantified and ecological approach included in population genetics studies (Lee and Mitchell-Olds,

81 2011). This information could be crucial in defining conservation and management units for the  
82 ecologically and economically important species (Segelbacher et al., 2010; Luque et al., 2012).

83 The wild rice *Zizania latifolia* is a perennial aquatic grass, and an important ecological and  
84 genetic resource in China. To date, the genetic differentiation of the wild rice across China has been  
85 attributed to IBD (Chen et al., 2017; Zhao et al., 2018; 2019). This is despite the fact that the  
86 distribution of wetlands in China, which represents the extant natural habitat for the species, has  
87 more unique features besides being expansive and patchy. The wetland ecosystem has a regional  
88 (Eastern) pattern with swamps distributed in the Northeast region and lakes in the middle-lower  
89 reaches of the Yangtze River and the Qinghai Tibet Plateau (Wang et al., 2012). Mangrove wetlands  
90 are distributed in the southeast coastal area. Topographically, the Eastern region, where most of the  
91 wetlands are found, is characterized by three plains; North, Northeast and Middle-Lower Yangtze  
92 plains amongst which foothills and hills are interspersed. This is the most economically important  
93 region characterized by a dense population, agriculture, and industries (An et al., 2007). China  
94 natural wetlands characteristics and distribution of *Z. latifolia*, therefore, presents an opportunity to  
95 study the landscape genetics of widespread species that have for long been neglected by conservation  
96 genetics community (Morente-López et al., 2018). This would aid in delineating the impact of island-  
97 like aquatic species distribution as well as human- and climate-change-induced habitat degradation  
98 (An et al., 2007) on the genetic structure of riparian plants at different spatial and environmental  
99 gradients. Further, the environmental gradient provides a perfect model for space-for-time  
100 substitution in assessing the long term aquatic ecosystem response to the changing environment (De  
101 Frenne et al., 2011).

102 In this study, we aimed to study the genetic diversity and population structure of 28 natural  
103 population of *Z. latifolia* based on 25 simple sequence repeat (SSR) markers and determine the  
104 influence of IBD, IBR and IBE in shaping the genetic structure. Based on the patchy nature of the  
105 wild rice habitat and the extensive latitudinal geographic range of the studied populations, it was  
106 predicted that *Z. latifolia* would show strong spatial genetic structure driven by diverse biotic and  
107 abiotic factors. It was expected that population decline and discontinuity, due to habitat degradation  
108 and fragmentation (An et al., 2007), could have considerable influence on wild rice reproduction  
109 system and gene flow, resulting in low genetic diversity. Further, we hypothesized that *Z. latifolia*  
110 genetic structure, in the expansive range and heterogeneous landscape, could be explained by  
111 combined effects of geographic isolation (IBD), gene-flow-limiting landscape variables (IBR) and  
112 differences in environmental variables between populations (IBE).

## 113 2 MATERIALS AND METHODS

### 114 2.1 Focal species, sampling and SSR data

115 The wild rice *Zizania latifolia*, commonly known as the Chinese wild rice, belongs to the  
116 family Poaceae, tribe Oryzeae. It shares the genus *Zizania* L. with other three species distributed in  
117 North America (*Z. aquatic*, *Z. palustris* and *Z. texana*) (Xu et al., 2010). *Z. latifolia* is a perennial  
118 species distributed in Eastern Asia and well differentiated from the North American species (Brown,  
119 1950; Dore, 1969; Chen et al., 1990; Kennard et al., 2000). It grows along the margins of lakes and  
120 rivers, ponds and marshes, and reproduces sexually by seeds or asexually by rhizomes (Xu and Zhou,  
121 2017). In China, the wild rice is an important ecological species that is exploited for wastewater  
122 purification due to its high nutrient uptake capacity (Liu et al., 2007; Zhou et al., 2007; Peng et al.,  
123 2013) and high clonal reproduction (Chen et al., 2017). It also carries important genetic traits that  
124 include disease and pest resistance, elite grain, and tolerance to cold and flooding (Liu et al., 1999;  
125 Yu et al., 2006; Shen et al., 2011; Wang et al., 2013). Natural populations of *Z. latifolia* are

126 distributed along the East of China along a wide stretch of latitudinal zones (21°N -50°N) (Wagutu et  
127 al., 2020). This region has five major eco-geographic regions that vary in biotic and abiotic factors  
128 that influence gene flow and local adaptation (Wu et al., 2003).

129 Twenty-eight populations of *Z. latifolia* were collected across China from Heilongjiang  
130 province to Guangdong province (Table 1) in a cluster sampling approach (Li et al., 2017). This was  
131 based on the size of the population, which should be large enough to allow a random selection of at  
132 least 20-23 samples at intervals of 10 meters. Samples were collected in the natural wetlands; rivers,  
133 lake shores and marshes during early autumn as the wild rice approaches maturity. GPS coordinates  
134 were recorded at the center of each collection transect and mapped using ArcGIS (Figure 1). The two  
135 uppermost leaves from each selected individuals were harvested, individually dried in silica gel and  
136 stored in the laboratory for DNA extraction. Total genomic DNA was extracted from 0.5g dried  
137 leaves using a modified CTAB protocol (Doyle and Doyle, 1987). Twenty five SSR markers were  
138 used in this study, including 20 markers developed for *Z. latifolia* (Quan et al., 2008; Wagutu et al.,  
139 2020), three SSR markers for *Oryza sativa* (Wang et al., 2015) and two markers developed for *Z.*  
140 *texana* (Richards et al., 2007) (Supplementary Table S1). PCR amplification was performed  
141 following the protocol by Quan et al. (2008) and PCR products separated on a 6% denaturing  
142 polyacrylamide gel. Fragments were visualized by silver staining and alleles scored in reference to a  
143 25bp DNA ladder (Promega, Madison, WI, USA).

144 GenoDive 2.0 (Meirmans et al., 2004) was used to identify clonal structure. At threshold zero,  
145 samples were assigned to their respective clones. The number of genotypes ( $G$ ) was calculated and  
146 repeating genotypes excluded from further analysis. Micro-Checker 2.2.3 (Van Oosterhout et al.,  
147 2004) was used to test for null alleles and genotyping errors. Genetic diversity across all loci for  
148 every population and for each locus was estimated in terms of observed allele number ( $N_a$ ), the  
149 effective number of alleles ( $N_e$ ), and expected and observed heterozygosity ( $H_E$  and  $H_o$ ) using  
150 GenAIE software (Peakall and Smouse, 2012). FSTAT (Goudet, 2001) was used to calculate the  
151 inbreeding coefficient ( $F_{IS}$ ), deviation from Hardy-Weinberg equilibrium and linkage disequilibrium.

## 152 2.2 Genetic structure among populations

153 FSTAT software was used to measure population genetic divergence by estimation of  $F_{ST}$   
154 using 999 permutations for their significance. Based on  $F_{ST}$  values, an average level of gene flow  
155 ( $Nm$ ) was estimated using the formula: [ $Nm = (1 - F_{ST})/4F_{ST}$ ] (Slatkin and Barton, 1989). ARLEQUIN  
156 software (Schneider et al., 2000) was used to perform analysis of molecular variance (AMOVA) to  
157 determine genetic variation among and within populations. STRUCTURE program (Pritchard et al.,  
158 2000) was used to perform Bayesian clustering of the samples. Ten independent runs for each  
159 number of  $K$  clusters from one to ten was performed. A 20,000 iteration burn-in period followed by  
160 100,000 Markov Chain Monte Carlo (MCMC) iterations were assumed for each run with correlated  
161 allele frequencies and admixture origin assumptions. To determine the value of  $K$ , the output was  
162 interpreted with Structure Harvester (Evanno et al., 2005; Earl and vonHoldt, 2012). However,  
163 Evanno's  $\delta K$  method has been reported to suffer philosophical and statistical errors (Verity and  
164 Nichols, 2016). Therefore, it was supplemented with Thermodynamic Integration (TI) method  
165 (Verity and Nichols, 2016). Here, *rmaverick* R package was used to estimate the true value of  $K$  by  
166 running 20 runs for  $K = 1$  to 10 with a burn-in period of 10,000 iterations followed by 50,000  
167 MCMC iterations under the admixture model. The value of  $K$  was estimated as described by Verity  
168 and Nichols (2016). Since both software did not differ in the estimation of  $K$ , Structure Harvester  
169 output was visualized by DISTRUCT v. 1.1 (Rosenberg, 2004). Identified clusters were analyzed for

170 molecular variations (AMOVA) using ARLEQUIN software. Geographical distribution of the  
171 different clusters identified was mapped using ArcGIS 10.0 (Esri, Redlands, CA, USA).

### 172 **2.3 Geographic and environmental influence on the genetic structure**

173 To determine the drivers of the observed genetic structure in *Z. latifolia*, we tested for  
174 isolation by distance (IBD), isolation by resistance (IBR) and isolation by environment (IBE)  
175 hypotheses. Four matrices were obtained in order to explore the three assumptions. Genetic distance  
176 was calculated as pairwise  $F_{ST}$  using FSTAT software, while the geographic distance matrix was  
177 based on Euclidean distance between populations calculated using GenAlEx. To linearize genetic and  
178 geographic distances relationship, both matrices were transformed:  $[F_{ST}/(1 - F_{ST})]$  and  $\log(\text{Euclidean}$   
179  $\text{distance})$ , respectively (Rousset, 1997). Nineteen environmental variables were extracted for the  
180 studied sites from BioClim's 30s resolution dataset (Busby, 1991) with GIS details using ArcGIS  
181 software (Supplementary Table S2). PAST ver. 3.24 (Hammer et al., 2001) was used to reduce  
182 climatic variables by principal component analysis (PCA) based on 20 variables (19 bioclimatic  
183 variables and elevation). The first principle components (PC) was used as it represented 99.32% of  
184 the variation in the data. Environmental distance matrix was calculated using the first principal  
185 component using *vegan* package in R (Oksanen et al., 2018). Lastly, resistance distance was  
186 calculated as the conductance matrix on a 30-arc seconds resolution digital elevation model (DEM)  
187 (Danielson and Gesch, 2011) of the study site using *gdistance* package implemented in R (van Etten,  
188 2017). The resistance distance was obtained by calculating the effective resistance between  
189 populations when the DEM grid is conceived as an electrical circuit (McRae et al., 2008). Since wind  
190 dispersal is considered a major factor in *Zizania latifolia* gene flow, DEM was slope-modeled in  
191 ArcGIS 10.0. The grid cells with high values (high slope) contribute high resistance to gene flow and  
192 those with low value contribute the least resistance. Movement from any cell within the grid followed  
193 the standard eight directions (McRae et al., 2008).

194 To compete the three hypotheses, we used reciprocal causal modeling (RCM) (Cushman et  
195 al., 2006; 2013b) that eliminates the simple Mantel test's (Mantel, 1967) limitations of spurious  
196 correlations and type I error (Cushman and Landguth, 2010). The RCM method directly compares  
197 the different hypotheses and identifies whether any of them is relatively supported independently of  
198 the other alternatives. The approach is based on a pair of partial Mantel tests derived from two  
199 models at a time. First, partial Mantel was performed between genetic distance (Gen) and IBD,  
200 partialling out IBR (Gen~IBD|IBR). The second partial Mantel was performed between the genetic  
201 distance (Gen) and IBR, partialling out the IBD (Gen~IBR|IBD). The difference between the two  
202 partial Mantel tests (IBD|IBR- IBR|IBD) was the relative support for IBD relative to IBR (Cushman  
203 et al., 2013a). In that case, the difference between the partial mantel should be positive if IBD is  
204 correct, and zero or negative if the IBR is correct. The full matrix of the partial Mantel tests  
205 differences between pairs of alternative hypotheses was computed. A hypotheses was regarded as  
206 fully supported, independent of all alternatives, if all the values in its column were positive and the  
207 values in the row were negative (Cushman et al., 2013a, b). Correlation values and significance  
208 values for the Mantel model combinations were calculated through 9999 corrected permutations  
209 using *vegan* R package.

210 We further evaluated the relationship between genetic diversity estimators and geographic  
211 and environmental variables through generalized linear models (GLMs) using PAST ver. 3.24  
212 (Hammer et al., 2001) and spatially explicit mixed modeling (Morente-López et al., 2018) using  
213 *spaMM* R package (Rousset and Ferdy, 2014). Firstly, generalized linear models were used to  
214 explore the contribution of each environmental variable to genetic diversity estimators ( $H_O$ ,  $H_E$  and  
215  $N_a$ ). Secondly, spatially explicit generalized linear mixed models (spatial GLMMs) were developed  
216 using genetic, geographic (coordinates and elevation) and environmental data. Here, we used genetic

217 diversity estimators ( $H_O$ ,  $H_E$  and  $N_a$ ) as response variables, each of the 19 environmental variables as  
218 fixed effects and geographical coordinates and elevation as random effects. We transformed  
219 environmental variables as required, including using their squared values to account for non-linearity.  
220 Full models (e.g. [ $F_{IS} \sim \text{bio}_1 + (1|lat+long/Elevation)$ ]) and null models (e.g. [ $F_{IS} \sim 1 +$   
221  $(1|lat+long/Elevation)$ ]) were tested for associated likelihood ratio to obtain the  $P$ -value.

### 222 3 RESULTS

223 From 578 individuals, 570 multilocus genotypes were identified, and no genotype was shared  
224 among populations. In 19 populations, every individual was of unique genotype (Table 1). We did  
225 not find evidence of null alleles or genotyping error using Micro-Checker. At the population level,  
226 the range of observed heterozygosity ( $H_O$ ) and expected heterozygosity ( $H_E$ ) were 0.113 to 0.488 and  
227 0.111 to 0.484, respectively (Table 1). Fixation index ranged from  $F_{IS} = -0.334$  to  $F_{IS} = 0.104$  with a  
228 mean of  $-0.036$ . Deviation from HWE was detected in 257 out of the 700 locus-population  
229 combinations (36.7%) at  $P = 0.05$ , which is expected for natural population at a broad geographical  
230 scale (Garnier-Géré and Chikhi, 2013). Significant genotypic disequilibrium was detected in 86 out  
231 of 300 locus pairs ( $P = 0.001$ ), but after Bonferroni correction, none of the locus pairs was in  
232 significant genotypic disequilibrium. This indicated that loci were unlinked and statistically  
233 independent of each other.

#### 234 3.1 Genetic structure and differentiation among populations

235 The genetic differentiation across all populations based on  $F_{ST}$  was 0.579 (Table 2). Pairwise  
236 comparisons of  $F_{ST}$  were significant for genetic differentiation between populations ( $P = 0.01$ ).  
237 Moreover, the levels of differentiation were high;  $F_{ST} = 0.103$  to 0.823 (Supplementary Table S3).  
238 AMOVA showed high population differentiation at  $\Phi_{pt} = 0.578$  ( $P=0.000$ ). Variation among  
239 populations was 58%, while 42% of the variation was within population, both statistically significant  
240 ( $P = 0.001$ ) (Table 3). Bayesian clustering using structure identified optimum  $K=5$  using the  
241 Evanno's delta  $K$  as well as TI method (Pritchard et al., 2000; Verity and Nichols, 2016). Populations  
242 from the five regions clustered according to their respective collection sites (Figure 2). Membership  
243 proportion of predefined populations in each of the 5 clusters ranged from 0.857 to 0.997. AMOVA  
244 showed that 36% of variation was among clusters (Table 3). The five identified clusters were mapped  
245 using ArcGIS (Figure 1).

#### 246 3.2 Geographic and environmental influence on the genetic structure

247 IBE model was fully supported based on the relative support values of the reciprocal causal  
248 model. The column had positive values and the row had negative values (Table 4) indicating that it  
249 explained the genetic structure independent of the alternative hypotheses. Moreover, the partial  
250 Mantel tests between genetic distance and environmental distance controlling for both resistance and  
251 geography showed significant positive correlations (Table 4). IBR model had one positive value in  
252 the column when competed with IBD and partial Mantel tests were all significant. IBD model had all  
253 negative value in the column and thus had the least relative support. However, partial Mantel tests  
254 when controlling for IBR showed a significant positive correlation. In simple Mantel, environmental  
255 distance had the highest significant positive correlation with genetic distance followed by resistance  
256 distance and then geographical distance (Table 4).

257 Generalized linear models showed that seven of the 19 bioclimatic variables had significant  
258 contribution to genetic diversity of *Z. latifolia* (Table 5). However, spatially explicit mixed models

259 with coordinates as random effect showed no significant influence of environmental variables to  
260 genetic diversity. When elevation was used as the random effect in the mixed models, bio\_15 showed  
261 significant influence ( $P = 0.038$ ) on number of alleles ( $N_a$ ). We tested the seven environmental  
262 variables showing significant contribution to genetic diversity in GLM for collinearity using variance  
263 inflation factor (VIF) analysis (Helsen et al., 2017). Two variables; bio\_5 and bio\_15 had VIF value  
264 below 2 and were therefore identified as the best environmental variables responsible for the genetic  
265 diversity of *Z. latifolia*.

## 266 4 DISCUSSION

267 In this study, *Zizania latifolia* showed relatively low genetic diversity ( $H_E = 0.292$ ). A similar  
268 level of genetic diversity was reported in its natural populations from the Northeast wetland ( $H_E =$   
269  $0.328$ ; Chen et al., 2017) and the lower-middle Yangtze wetland ( $H_E = 0.271$ ; Wang et al., 2015)  
270 using SSR markers. Our results are consistent with the expected average genetic variability for the  
271 family Poaceae ( $H_E = 0.201$ ), which is estimated based on characteristics that influence gene flow  
272 (Hamrick and Godt, 1996). These results also correspond to Northern American wild rice *Z. palustris*  
273 genetic diversity ( $H_E = 0.236$ ; Lu et al., 2005). Further, *Z. latifolia* shows lower genetic diversity  
274 compared to *Z. texana* ( $H_E = 0.662$ ; Richards et al., 2007). However, the two studies employed  
275 different sampling approaches, with Richards et al. (2007) considering a single hydrologically  
276 connected river system, while we sampled different populations across large geographical and  
277 environmental gradient (Figure 1). A higher than average genetic diversity in populations in region  
278 III, along the Yangtze River ( $H_E = 0.424$ ) and region IV, along the Yellow River ( $H_E = 0.426$ ) was  
279 observed. Similar results were reported by Chen et al. (2012) and Zhao et al. (2018) who showed that  
280 *Z. latifolia* wild populations in the middle and lower reaches of the Yangtze basin exhibit high  
281 genetic diversity. This could be explained that, the central and southeast China wetlands are  
282 characterized by episodic floods that create temporary hydrological connectivity (Wang et al., 2008)  
283 resulting in gamete exchange between population. Genetic diversity is then maintained by the high  
284 clonal capacity of the species.

### 285 4.1 Genetic structure and differentiation among populations

286 High level of genetic differentiation among populations was detected ( $F_{ST} = 0.579$   $D_{est} =$   
287  $0.598$ ). Our results are comparable to *Z. latifolia* genetic differentiation reported recently ( $F_{ST} =$   
288  $0.481$ , Xu et al., 2008;  $F_{ST} = 0.405$ , Chen et al., 2017). AMOVA analysis also showed high  
289 population differentiation at  $\Phi_{pt} = 0.578$  ( $P=0.001$ ), with 58% variation attributed to between  
290 populations and 42% to within population ( $P = 0.001$ ) variation. This was also comparable to *Z.*  
291 *latifolia* population differentiation ( $\Phi_{pt} = 0.598$ ) reported by Xu et al. (2015). Moreover, high  
292 population differentiation was also reported in the North American relatives of *Z. latifolia* (*Z.*  
293 *aquatica*:  $F_{ST} = 0.607$ ; *Z. palustris*:  $F_{ST} = 0.468$ ; Xu et al., 2015). The observed high genetic  
294 divergence is attributable to decreased gene flow between populations ( $Nm = 0.061$ ). According to  
295 Wright (1969), when  $Nm$  is perceived as the exchange of migrants between demes per generation, a  
296 value  $> 1$  result in little divergence, while value  $< 1$  results in increased divergence. In our case,  
297 conventional fragmentation of wetlands into islands within the expansive terrestrial habitat and  
298 induced fragmentation could explain the negligible gene flow and the observed high genetic  
299 differentiation (Wagutu et al., 2020). Moreover, inbreeding system detected in some populations  
300 could have contributed to the high genetic differentiation. Bayesian clustering using STRUCTURE  
301 software and *rmaverick* (R package) identified five clusters (Figure 2). All the five clusters  
302 corresponded to the wetland from which the samples were collected. The clustering pattern can be  
303 attributed to the *Z. latifolia* habitat, which is discrete and patchy within an expansive geographical

304 range (Zhao et al., 2018). Further, dispersal of its gametes and somatic propagules depend on  
305 hydrological connectivity and landscape features. In such spatially isolated populations under a  
306 heterogenous landscape, wind and water dispersal is most effective locally creating locally identical  
307 genotypes. Environmental difference between the geographically isolated populations promote  
308 phenotypic plasticity and genetic changes.

#### 309 **4.2 Environmental, landscape and geographical influence on genetic structure and genetic** 310 **diversity**

311 For the first time, this study tested for IBE and IBR patterns, besides the commonly tested  
312 IBD pattern in the natural populations of *Z. latifolia*. Interestingly, we found exclusive relative  
313 support by RCM for IBE pattern, partial support for IBR, but not IBD, in shaping genetic structuring  
314 of the species. Similarly, Šurinová et al. (2019) reported that environmental variables, but not  
315 geographical distance, explained genetic relatedness among a perennial grass species (*Festuca rubra*)  
316 populations. Wu et al. (2019), when comparing IBD and IBE in aquatic species *Ranunculus*  
317 *subrigidus* on the Qinghai-Tibetan plateau, also found exclusive support for environmental isolation.  
318 Further, IBE has been reported as a more common phenomenon compared to IBD in a wide range of  
319 taxa (Shafer et al., 2013; Sexton et al., 2014), although it has for long been neglected in population  
320 genetic studies. IBE can be generated by various ecological processes that include; natural and sexual  
321 selection against maladapted immigrants, poor hybrid fitness and biased dispersal (Wang and  
322 Bradburd, 2014). In natural selection, populations evolve traits suitable for the environment and thus  
323 acquire higher fitness compared to immigrants from different environments. Sexual selection and  
324 dispersal bias may occur as a result of phenotypic plasticity. Here, environmental conditions  
325 influence reproductive physiology affecting synchronization of mating and dispersal processes such  
326 flowering and gamete release. Moreover, if immigrants survive long enough and are able to mate  
327 locally, hybrids would undergo selection against immigrant alleles (Sexton et al., 2014). The sexual  
328 reproduction of *Z. latifolia* could be one characteristic that makes natural and sexual selection as well  
329 as dispersal bias drive local adaptation and thus the observed pattern of IBE. However, the species  
330 also reproduces asexually through rhizomes and thus hybrids survival could be a tradeoff. The net  
331 effect of ecological processes targeting sexual reproduction and asexual reproduction, however,  
332 seems to favor local adaptation and hence the exclusive support of IBE by RCM.

333 In this study, IBE was further supported by the significant relationship between genetic  
334 diversity estimators and a number of environmental variables in the GLMs, although limited  
335 relationship in the spatial GLMMs (Table 5). Maximum temperature of the warmest month (bio\_5)  
336 and precipitation seasonality (bio\_15) were identified as the best environmental variables responsible  
337 for observed genetic differentiation based on VIF analysis. Temperature and precipitation are major  
338 drivers of plant adaptability through their influence on physiology and diversity (Hoffmann and Sgrò,  
339 2011; Manel et al., 2012), forcing genetic change events and subsequent selection. Besides our study,  
340 influence of temperature and precipitation on genetic differentiation of both aquatic and terrestrial  
341 plants have been reported (Wang et al., 2016; Münzbergová et al., 2017). A significant relationship  
342 between precipitation seasonality (bio\_15) and  $N_a$  was detected in our study. This indicates that the  
343 local adaptation, driven by interaction between precipitation and temperature, is responsible for *Z.*  
344 *latifolia* differentiation along the eastern China aquatic ecosystem. This could be due to the fact that  
345 the species is tolerant to a wide range of temperatures (Guo et al., 2007), but since it's an aquatic  
346 species, the differences in precipitation along the sampling sites and between seasons has profound  
347 influence. As a perennial and aquatic species, *Z. latifolia* reproduction and growth will be affected by  
348 temperature and precipitation fluctuations. Flowering, vegetative growth and reproductive success of  
349 plants have been reported to respond to temperature changes (De FRENNE et al., 2011). Similarly,



350 asynchronous flowering due to heterogenous rainfall patterns have been associated with IBE pattern  
351 (Garot et al., 2019).

352 IBR was the second best model explaining *Z. latifolia* genetic structuring. In partial Mantel,  
353 IBR had a positive correlation with genetic diversity when controlling for both geographical distance  
354 and environment. The model was partially supported by RCM (Table 4). Similarly, significant effect  
355 of cost distance on genetic differentiation has been reported in alpine ecosystem (Morente-López et  
356 al., 2018). Wetlands along eastern China are islands within terrestrial ecosystem interspersed with  
357 foothills and hills (An et al., 2007; Santamaria, 2002). Such natural barriers are important factors in  
358 the gene flow of flowering plants. Similar, albeit artificial barriers, have been reported to drive  
359 genetic differentiation in species that depend on wind, insects and birds for pollination and seed  
360 dispersal (Su et al., 2003). In the case of *Z. latifolia*, wind pollination seems to be inhibited by the  
361 complex landscape along the eastern China, and seed dispersal by lack of hydrological connectivity,  
362 which leads to genetic drift and thus population differentiation.

363 The exclusive IBE pattern detected contradicts Zhao et al. (2018; 2019) who reported a  
364 pattern of IBD along the eastern China populations of *Z. latifolia*. However, in their study, only IBD  
365 was tested using simple Mantel, for which we also found a strong positive correlation ( $r=0.5830$ ;  
366  $P=0.001$ ). The observed direct correlation of genetic differentiation with geographical distance  
367 between populations could be due to the discrete pattern of *Z. latifolia* populations along the  
368 expansive geographical area. Moreover, rapid fragmentation and reclamation of the wetlands (An et  
369 al., 2007; Zhao et al., 2018) has increased population isolation, which inhibits wind- and water-  
370 mediated gamete dispersal. In our study, IBD was the least supported hypothesis in partial Mantel.  
371 When controlling for IBR, significant correlation between IBD and genetic differentiation was  
372 detected (Table 4). This could be because calculation of cost distance on DEM has an aspect of  
373 distance (Morente-López et al., 2018).

### 374 4.3 Implications for conservation and management

375 The genetic variation in the extant natural populations of *Z. latifolia* is relatively low and the  
376 high genetic divergence is shaped by environmental variation between groups of populations. The  
377 heterogenous landscape, discrete distribution of the natural populations coupled with wetland  
378 fragmentation and degradation has increased the isolation resulting in genetic isolation. Genetic  
379 diversity measures were sensitive to temperature and precipitation. Between 1956 and 2005, earth  
380 surface temperature has increased at an average of 0.65°C and might increase with further 1.8°C to  
381 4°C by 2099 (IPCC, 2007). This is expected to affect the precipitation and together impact on species  
382 diversity and survival. Therefore, further extensive genetic and morphological studies need to be  
383 carried out to identify the role of the environment in shaping local adaptation of the *Z. latifolia*,  
384 besides the aquatic ecosystem response assessment. The use of a common garden approach in  
385 combination with genome-wide association studies (GWAS) could help elucidate patterns of local  
386 adaptation (de Villemereuil et al., 2016).

387 Our results show that gene flow is critically inhibited among the populations. Therefore,  
388 management and conservation approaches should include both *in-situ* and *ex-situ* considerations.  
389 Populations in the central and southeast China wetland (e.g. CH, LZXX, and DT) that showed the  
390 highest genetic variability should be prioritized for germplasm collection and conservation. The  
391 genetic profiles of the sampled populations within each of the five clusters could constitute valuable  
392 traits that require conservation as well. Geographic barriers showed positive correlation to genetic  
393 structuring of *Z. latifolia*. This is related to topographical complexity, which impedes pollen

394 dispersal. While nothing can be done about the topography, seed and somatic propagule dispersal  
395 through water can be enhanced. Where landscapes are disconnected, revegetation with broad  
396 genotypes can be used to promote gene flow, which may also include deliberate movement of  
397 propagules across fragmented landscapes (Reviewed by Sexton et al., 2014). Chen et al. (2017)  
398 proposed dredging the watercourses to achieve hydrological connectivity within each wetland.  
399 Populations along the Yangtze and Yellow river exchange gametes through periodical floods, which  
400 shows that this approach is feasible in other wetlands.

## 401 **5 Data accessibility**

402  
403 All datasets for this study are included in the article's Supplementary Material

## 404 **6 Authors' contribution**

405  
406 YC conceived the idea and designed the research project. WL gave suggestions to the design of the  
407 study. YC, XF and WF collected the samples and assembled experiment materials. GKW, XF  
408 performed the experiment. GKW analyzed the data and wrote the manuscript. All authors contributed  
409 to the revision and final editing of the manuscript prior to submission.

## 410 **7 Funding**

411  
412 This work was supported by Chinese Academy of Sciences (Y855291B01) and the CAS-TWAS  
413 President's Fellowship for International Doctoral Students.

## 414 **8 Supplementary material**

415 **Supplementary Table S1.** Details of SSR primer sequences used in this study

416 **Supplementary Table S2.** Genetic diversity measures, geographical variables and bioclimatic  
417 variables used in in this study

418 **Supplementary Table S3.**  $F_{ST}$  pairwise matrix, all significant at  $P = 0.05$

## 419 **9 References**

420 An, S., Li, H., Guan, B., Zhou, C., Wang, Z., Deng, Z., et al. (2007). China's natural wetlands: Past  
421 problems, current status, and future challenges. *AMBIO: A Journal of the Human Environment*  
422 36(4), 335–342. [https://doi.org/10.1579/0044-7447\(2007\)36\[335:CNWPPC\]2.0.CO;2](https://doi.org/10.1579/0044-7447(2007)36[335:CNWPPC]2.0.CO;2)

423 Andrews, C. A. (2010). Natural selection, genetic drift, and gene flow do not act in isolation in  
424 natural populations. *Nature Education Knowledge* 3(10), 5.

425 Barrett, S. C. H., Eckert, C. G., and Husband, B. C. (1993). Evolutionary processes in aquatic plant  
426 populations. *Aquatic Botany* 44(2–3), 105–145. [https://doi.org/10.1016/0304-3770\(93\)90068-8](https://doi.org/10.1016/0304-3770(93)90068-8)

427 Bell, G., and Collins, S. (2008). Adaptation, extinction and global change. *Evolutionary*  
428 *applications* 1(1), 3–16. <https://doi.org/10.1111/j.1752-4571.2007.00011.x>

- 429 Brown, W. V. (1950). A Cytological Study of Some Texas Gramineae. *Bulletin of the Torrey*  
430 *Botanical Club* 77(2), 63. <https://doi.org/10.2307/2482267>
- 431 Busby, J. (1991). BIOCLIM – A bioclimate analysis and prediction system. *Plant Protection*  
432 *Quarterly* 6, 8–9.
- 433 Catullo, R. A., Llewelyn, J., Phillips, B. L., and Moritz, C. C. (2019). The Potential for Rapid  
434 Evolution under Anthropogenic Climate Change. *Current Biology* 29(19), R996–R1007.  
435 <https://doi.org/10.1016/j.cub.2019.08.028>
- 436 Cao, Y., Neif, É., Li, W., Coppens, J., Filiz, N., Lauridsen, T., et al. (2015). Heat wave effects on  
437 biomass and vegetative growth of macrophytes after long-term adaptation to different temperatures:  
438 A mesocosm study. *Climate Research* 66(3), 265–274. <https://doi.org/10.3354/cr01352>
- 439 Chen, S. L., Qin, H. Z., Jin, Y. X., and Shu, P. (1990). Preliminary studies on systematic position and  
440 evolution of *Zizania* L. (Gramineae). In: *Proc. Intern. Symp. Bot. Gard. Nanjing* pp. 593–605.
- 441 Chen, Y.-Y., Chu, H.-J., Liu, H., and Liu, Y.-L. (2012). Abundant genetic diversity of the wild rice  
442 *Zizania latifolia* in central China revealed by microsatellites. *Annals of Applied Biology* 161(2), 192–  
443 201. <https://doi.org/10.1111/j.1744-7348.2012.00564.x>
- 444 Chen, Y., Liu, Y., Fan, X., Li, W., and Liu, Y. (2017). Landscape-Scale Genetic Structure of Wild  
445 Rice *Zizania latifolia*: The Roles of Rivers, Mountains and Fragmentation. *Frontiers in Ecology and*  
446 *Evolution* 5. <https://doi.org/10.3389/fevo.2017.00017>
- 447 Cushman, S. A., and Landguth, E. L. (2010). Spurious correlations and inference in landscape  
448 genetics. *Molecular Ecology* 19(17), 3592–3602. <https://doi.org/10.1111/j.1365-294X.2010.04656.x>
- 449 Cushman, S. A., McKelvey, K. S., Hayden, J., and Schwartz, M. K. (2006). Gene flow in complex  
450 landscapes: Testing multiple hypotheses with causal modeling. *The American Naturalist* 168 (4),  
451 486–499. <https://doi.org/10.1086/506976>
- 452 Cushman, S. A., Shirk, A. J., and Landguth, E. L. (2013a). Landscape genetics and limiting factors.  
453 *Conservation Genetics* 14(2), 263–274. <https://doi.org/10.1007/s10592-012-0396-0>
- 454 Cushman, S., Wasserman, T., Landguth, E., and Shirk, A. (2013b). Re-Evaluating Causal Modeling  
455 with Mantel Tests in Landscape Genetics. *Diversity* 5(1), 51–72. <https://doi.org/10.3390/d5010051>
- 456 Danielson, J. J. and Gesch, D. B. (2011). Global multi-resolution terrain elevation data 2010  
457 (GMTED2010): U.S. *Geological Survey Open-File Report* 26, 2011–1073.
- 458 Davidson, N. C. (2014). How much wetland has the world lost? Long-term and recent trends in  
459 global wetland area. *Marine and Freshwater Research* 65(10), 934–941.  
460 <https://doi.org/10.1071/MF14173>
- 461 De Frenne, P., Brunet, J., Shevtsova, A., Kolb, A., Graae, B. J., Chabrierie, O., et al. (2011).  
462 Temperature effects on forest herbs assessed by warming and transplant experiments along a

- 463 latitudinal gradient. *Global Change Biology* 17(10), 3240–3253. <https://doi.org/10.1111/j.1365->  
464 [2486.2011.02449.x](https://doi.org/10.1111/j.1365-2486.2011.02449.x)
- 465 de Villemereuil, P., Gaggiotti, O. E., Mousterde, M., and Till-Bottraud, I. (2016). Common garden  
466 experiments in the genomic era: New perspectives and opportunities. *Heredity* 116(3), 249–254.  
467 <https://doi.org/10.1038/hdy.2015.93>
- 468 Dore, W.G. (1969). *Wild rice*. Can. Dept. Agric. Publ. no. 1393, Ottawa, Ontario, Canada.
- 469 Doyle, J. J., and Doyle, J. L. (1987). A rapid DNA isolation procedure for small quantities of fresh  
470 leaf tissue. *Phytochem. Bull.* 19, 11–15.
- 471 Earl, D. A., and vonHoldt, B. M. (2012). STRUCTURE HARVESTER: A website and program for  
472 visualizing STRUCTURE output and implementing the Evanno method. *Conservation Genetics*  
473 *Resources* 4(2), 359–361. <https://doi.org/10.1007/s12686-011-9548-7>
- 474 Evanno, G., Regnaut, S., and Goudet, J. (2005). Detecting the number of clusters of individuals using  
475 the software structure: A simulation study. *Molecular Ecology* 14(8), 2611–2620.  
476 <https://doi.org/10.1111/j.1365-294X.2005.02553.x>
- 477 Garnier-Géré, P., and Chikhi, L. (2013). Population Subdivision, Hardy-Weinberg Equilibrium and  
478 the Wahlund Effect. In John Wiley & Sons Ltd (Ed.), *ELS* (p. a0005446.pub3). John Wiley & Sons,  
479 Ltd. <https://doi.org/10.1002/9780470015902.a0005446.pub3>
- 480 Garot, E., Joët, T., Combes, M.-C., and Lashermes, P. (2019). Genetic diversity and population  
481 divergences of an indigenous tree (*Coffea mauritiana*) in Reunion Island: Role of climatic and  
482 geographical factors. *Heredity* 122(6), 833–847. <https://doi.org/10.1038/s41437-018-0168-9>
- 483 Goudet, J. (2001). *FSTAT ver 2.9.3, A program to Estimate and Test Gene Diversities and Fixation*  
484 *Indices*. Available online at: <https://www2.unil.ch/popgen/softwares/fstat.htm>
- 485 Grant, P. R., Grant, B. R., Huey, R. B., Johnson, M., Knoll, A. H., and Schmitt, J. (2017). Evolution  
486 caused by extreme events. *Philosophical transactions of the Royal Society of London. Series B,*  
487 *Biological sciences* 372(1723), 20160146. <https://doi.org/10.1098/rstb.2016.0146>
- 488 Guo, H. B., Li, S. M., Peng, J., and Ke, W. D. (2007). *Zizania latifolia* Turcz. Cultivated in China.  
489 *Genetic Resources and Crop Evolution* 54(6), 1211–1217. [https://doi.org/10.1007/s10722-006-9102-](https://doi.org/10.1007/s10722-006-9102-8)  
490 [8](https://doi.org/10.1007/s10722-006-9102-8)
- 491 Hall, L. A., and Beissinger, S. R. (2014). A practical toolbox for design and analysis of landscape  
492 genetics studies. *Landscape Ecology* 29(9), 1487–1504. <https://doi.org/10.1007/s10980-014-0082-3>
- 493 Halley, J. M., Monokrousos, N., Mazaris, A. D., Newmark, W. D., and Vokou, D. (2016). Dynamics  
494 of extinction debt across five taxonomic groups. *Nature Communications* 7(1), 12283.  
495 <https://doi.org/10.1038/ncomms12283>
- 496 Hammer, Ø., Harper, D. A. T., and Ryan, P. D. (2001). PAST: paleontological statistics software  
497 package for education and data analysis. *Palaeontologia Electronica* 4, 1–9.

- 498 Hamrick, J. L., and Godt, M. J. W. (1996). Effects of life history traits on genetic diversity in plant  
499 species. *Philosophical Transactions of the Royal Society of London. Series B, Biological Sciences*  
500 351, 1291–1298.
- 501 Helsen, K., Acharya, K. P., Brunet, J., Cousins, S. A. O., Decocq, G., Hermy, M., et al. (2017).  
502 Biotic and abiotic drivers of intraspecific trait variation within plant populations of three herbaceous  
503 plant species along a latitudinal gradient. *BMC Ecology* 17(1), 38. [https://doi.org/10.1186/s12898-](https://doi.org/10.1186/s12898-017-0151-y)  
504 [017-0151-y](https://doi.org/10.1186/s12898-017-0151-y)
- 505 Hoffmann, A. A., and Sgrò, C. M. (2011). Climate change and evolutionary adaptation. *Nature*  
506 470(7335), 479–485. <https://doi.org/10.1038/nature09670>
- 507 IPCC (2007). *Climate Change 2007: Synthesis Report. Contribution of Working Groups I, II and III*  
508 *to the Fourth Assessment Report*. Intergovernmental Panel on Climate Change, Geneva, Switzerland.
- 509 Jenkins, D. G., Carey, M., Czerniewska, J., Fletcher, J., Hether, T., Jones, A., et al. (2010). A meta-  
510 analysis of isolation by distance: Relic or reference standard for landscape genetics? *Ecography* 33,  
511 315–320. <https://doi.org/10.1111/j.1600-0587.2010.06285.x>
- 512 Kennard, W. C., Phillips, R. L., Porter, R. A., and Grombacher, A. W. (2000). A comparative map of  
513 wild rice (*Zizania palustris* L. 2n=2x=30). *Theoretical and Applied Genetics* 101(5–6), 677–684.  
514 <https://doi.org/10.1007/s001220051530>
- 515 Lande, R., and Shannon, S. (1996). The role of genetic variation in adaptation and population  
516 persistence in a changing environment. *Evolution* 50, 434–437.
- 517 Landguth, E. L., and Schwartz, M. K. (2014). Evaluating sample allocation and effort in detecting  
518 population differentiation for discrete and continuously distributed individuals. *Conservation*  
519 *Genetics* 15(4), 981–992. <https://doi.org/10.1007/s10592-014-0593-0>
- 520 Lee, C.-R., and Mitchell-Olds, T. (2011). Quantifying effects of environmental and geographical  
521 factors on patterns of genetic differentiation. *Molecular Ecology* 20(22), 4631–4642.  
522 <https://doi.org/10.1111/j.1365-294X.2011.05310.x>
- 523 Li, Y., Zhang, X.-X., Mao, R.-L., Yang, J., Miao, C.-Y., Li, Z., et al. (2017). Ten Years of Landscape  
524 Genomics: Challenges and Opportunities. *Frontiers in Plant Science* 8, 2136.  
525 <https://doi.org/10.3389/fpls.2017.02136>
- 526 Liu, B., Piao, H., Zhao, F., Zhao, J., and Zhao, R. (1999). Production and molecular characterization  
527 of rice lines with introgressed traits from a wild species *Zizania latifolia* (Griseb.). *J. Genet. Breed.*  
528 53, 279–284.
- 529 Liu, J. G., Dong, Y., Xu, H., Wang, D. K., and Xu, J. K. (2007). Accumulation of Cd, Pb and Zn by  
530 19 wetland plant species in constructed wetland. *Journal of Hazardous Materials* 147(3), 947–953.  
531 doi: 10.1016/j.jhazmat.2007.01.125

- 532 Lu, Y., Waller, D. M., and David, P. (2005). Genetic variability is correlated with population size and  
533 reproduction in American wild-rice (*Zizania palustris* var. *Palustris*, Poaceae) populations. *American*  
534 *Journal of Botany* 92(6), 990–997. <https://doi.org/10.3732/ajb.92.6.990>
- 535 Luque, S., Saura, S., and Fortin, M.-J. (2012). Landscape connectivity analysis for conservation:  
536 Insights from combining new methods with ecological and genetic data. *Landscape Ecology* 27(2),  
537 153–157. <https://doi.org/10.1007/s10980-011-9700-5>
- 538 Manel, S., and Holderegger, R. (2013). Ten years of landscape genetics. *Trends in Ecology &*  
539 *Evolution* 28(10), 614–621. <https://doi.org/10.1016/j.tree.2013.05.012>
- 540 Manel, S., Gugerli, F., Thuiller, W., Alvarez, N., Legendre, P., Holderegger, R., Gielly, L., et al.  
541 (2012). Broad-scale adaptive genetic variation in alpine plants is driven by temperature and  
542 precipitation. *Molecular Ecology* 21(15), 3729–3738. [https://doi.org/10.1111/j.1365-](https://doi.org/10.1111/j.1365-294X.2012.05656.x)  
543 [294X.2012.05656.x](https://doi.org/10.1111/j.1365-294X.2012.05656.x)
- 544 Mantel, N. (1967). The detection of disease clustering and a generalized regression approach. *Cancer*  
545 *Res.* 27, 209–220.
- 546 Marrot, P., Garant, D., and Charmantier, A. (2017). Multiple extreme climatic events strengthen  
547 selection for earlier breeding in a wild passerine. *Philosophical Transactions of the Royal Society B:*  
548 *Biological Sciences* 372(1723), 20160372. <https://doi.org/10.1098/rstb.2016.0372>
- 549 McRae, B. H. (2006). Isolation by resistance. *Evolution* 60(8), 1551–1561.  
550 <https://doi.org/10.1111/j.0014-3820.2006.tb00500.x>
- 551 McRae, B. H., Dickson, B. G., Keitt, T. H., and Shah, V. B. (2008). Using circuit theory to model  
552 connectivity in ecology, evolution, and conservation. *Ecology* 89(10), 2712–2724.  
553 <https://doi.org/10.1890/07-1861.1>
- 554 Meirmans, P. G. (2012). The trouble with isolation by distance. *Molecular Ecology* 21(12), 2839–  
555 2846. <https://doi.org/10.1111/j.1365-294X.2012.05578.x>
- 556 Meirmans, P. G., and Van Tienderen, P. H. (2004). genotype and genodive: Two programs for the  
557 analysis of genetic diversity of asexual organisms. *Molecular Ecology Notes* 4(4), 792–794.  
558 <https://doi.org/10.1111/j.1471-8286.2004.00770.x>
- 559 Morente-López, J., García, C., Lara-Romero, C., García-Fernández, A., Draper, D., and Iriondo, J.  
560 M. (2018). Geography and Environment Shape Landscape Genetics of Mediterranean Alpine Species  
561 *Silene ciliata* Poir. (Caryophyllaceae). *Frontiers in Plant Science* 9, 1698.  
562 <https://doi.org/10.3389/fpls.2018.01698>
- 563 Münzbergová, Z., Hadincová, V., Skálová, H., and Vandvik, V. (2017). Genetic differentiation and  
564 plasticity interact along temperature and precipitation gradients to determine plant performance under  
565 climate change. *Journal of Ecology* 105(5), 1358–1373. <https://doi.org/10.1111/1365-2745.12762>
- 566 Oksanen, J., Blanchet, F. G., Kindt, R., Legendre, P., Minchin, R. B., et al. (2018). vegan:  
567 Community Ecology Package. *R package version 2.5-3*. <https://CRAN.R-project.org/package=vegan>.

- 568 Orsini, L., Vanoverbeke, J., Swillen, I., Mergeay, J., and De Meester, L. (2013). Drivers of  
569 population genetic differentiation in the wild: Isolation by dispersal limitation, isolation by  
570 adaptation and isolation by colonization. *Molecular Ecology* 22(24), 5983–5999.  
571 <https://doi.org/10.1111/mec.12561>
- 572 Peakall, R., and Smouse, P. E. (2012). GenAlEx 6.5: Genetic analysis in Excel. Population genetic  
573 software for teaching and research--an update. *Bioinformatics* 28(19), 2537–2539.  
574 <https://doi.org/10.1093/bioinformatics/bts460>
- 575 Peng, S.-L., You, W.-H., Qi, G., and Yang, F.-L. (2013). Nitrogen and Phosphorus Uptake Capacity  
576 and Resource Use of Aquatic Vegetables Floating Bed in the Eutrophicated Lake. *2013 Third  
577 International Conference on Intelligent System Design and Engineering Applications* 994–997.  
578 <https://doi.org/10.1109/ISDEA.2012.237>
- 579 Pritchard, J. K., Stephens, M., and Donnelly, P. (2000). Inference of population structure using  
580 multilocus genotype data. *Genetics* 155(2), 945–959.
- 581 Pykälä, J. (2019). Habitat loss and deterioration explain the disappearance of populations of  
582 threatened vascular plants, bryophytes and lichens in a hemiboreal landscape. *Global Ecology and  
583 Conservation* 18, e00610. <https://doi.org/10.1016/j.gecco.2019.e00610>
- 584 Qin, B. (2008). *Lake Taihu, China: Dynamics and environmental change*. Dordrecht: Springer.
- 585 Quan, Z., Pan, L., Ke, W., Liu, Y., and Ding, Y. (2009). Sixteen polymorphic microsatellite markers  
586 from *Zizania latifolia* Turcz. (Poaceae). *Molecular Ecology Resources* 9(3), 887–889.  
587 <https://doi.org/10.1111/j.1755-0998.2008.02357.x>
- 588 Richards, C. M., Antolin, M. F., Reilley, A., Poole, J., and Walters, C. (2007). Capturing genetic  
589 diversity of wild populations for ex situ conservation: Texas wild rice (*Zizania texana*) as a model.  
590 *Genetic Resources and Crop Evolution* 54(4), 837–848. <https://doi.org/10.1007/s10722-006-9167-4>
- 591 Rosenberg, N. A. (2003). distruct: A program for the graphical display of population structure.  
592 *Molecular Ecology Notes* 4(1), 137–138. <https://doi.org/10.1046/j.1471-8286.2003.00566.x>
- 593 Rousset, F. (1997). Genetic Differentiation and Estimation of Gene Flow from F-Statistics Under  
594 Isolation by Distance. *Genetics* 145(4), 1219.
- 595 Rousset, F., and Ferdy, J.-B. (2014). Testing environmental and genetic effects in the presence of  
596 spatial autocorrelation. *Ecography* 37(8), 781–790. <https://doi.org/10.1111/ecog.00566>
- 597 Santamaría, L. (2002). Why are most aquatic plants widely distributed? Dispersal, clonal growth and  
598 small-scale heterogeneity in a stressful environment. *Acta Oecologica* 23(3), 137–154.  
599 [https://doi.org/10.1016/S1146-609X\(02\)01146-3](https://doi.org/10.1016/S1146-609X(02)01146-3)
- 600 Schneider, S., Roessli, D., and Excoffier, L. (2000). *Arlequin: A Software for Population Genetics  
601 Data Analysis, Version 2.0*. Geneva, Switzerland: Genetics and Biometry Laboratory, Department of  
602 Anthropology, University of Geneva.

- 603 Segelbacher, G., Cushman, S. A., Epperson, B. K., Fortin, M.-J., Francois, O., Hardy, O. J., et al.  
604 (2010). Applications of landscape genetics in conservation biology: Concepts and challenges.  
605 *Conservation Genetics* 11(2), 375–385. <https://doi.org/10.1007/s10592-009-0044-5>
- 606 Sexton, J. P., Hangartner, S. B., and Hoffmann, A. A. (2014). Genetic isolation by environment or  
607 distance: which pattern of gene flow is most common?: special section. *Evolution* 68(1), 1–15.  
608 <https://doi.org/10.1111/evo.12258>
- 609 Shafer, A. B. A., and Wolf, J. B. W. (2013). Widespread evidence for incipient ecological speciation:  
610 A meta-analysis of isolation-by-ecology. *Ecology Letters* 16(7), 940–950.  
611 <https://doi.org/10.1111/ele.12120>
- 612 Shen, W., Song, C., Chen, J., Fu, Y., Wu, J., and Jiang, S. (2011). Transgenic Rice Plants Harboring  
613 Genomic DNA from *Zizania latifolia* Confer Bacterial Blight Resistance. In *Rice Science* 18(1), 17-  
614 22. [https://doi.org/10.1016/S1672-6308\(11\)60003-6](https://doi.org/10.1016/S1672-6308(11)60003-6).
- 615 Slatkin, M. (1985). Gene flow in natural populations. *Annu. Rev. Ecol. Syst.* 16, 393–430.
- 616 Slatkin, M., and Barton, N. H. (1989). A comparison of three indirect methods for estimating average  
617 levels of gene flow. *Evolution* 43(7), 1349–1368. [https://doi.org/10.1111/j.1558-  
618 5646.1989.tb02587.x](https://doi.org/10.1111/j.1558-5646.1989.tb02587.x)
- 619 Sork, V. L., Nason, J., Campbell, D. R., and Fernandez, J. F. (1999). Landscape approaches to  
620 historical and contemporary gene flow in plants. *Trends in Ecology & Evolution* 14(6), 219–224.  
621 [https://doi.org/10.1016/S0169-5347\(98\)01585-7](https://doi.org/10.1016/S0169-5347(98)01585-7)
- 622 Su, H., Qu, L.-J., He, K., Zhang, Z., Wang, J., Chen, Z., and Gu, H. (2003). The Great Wall of China:  
623 A physical barrier to gene flow? *Heredity* 90(3), 212–219. <https://doi.org/10.1038/sj.hdy.6800237>
- 624 Šurinová, M., Hadincová, V., Vandvik, V., and Münzbergová, Z. (2019). Temperature and  
625 precipitation, but not geographic distance, explain genetic relatedness among populations in the  
626 perennial grass *Festuca rubra*. *Journal of Plant Ecology* 12(4), 730–741.  
627 <https://doi.org/10.1093/jpe/rtz010>
- 628 Tucker, J. M., Schwartz, M. K., Truex, R. L., Wisely, S. M., and Allendorf, F. W. (2014). Sampling  
629 affects the detection of genetic subdivision and conservation implications for fisher in the Sierra  
630 Nevada. *Conservation Genetics* 15(1), 123–136. <https://doi.org/10.1007/s10592-013-0525-4>
- 631 van Etten, J. (2017). R package gdistance: Distances and routes on geographical grids. *Journal of*  
632 *Statistical Software* 76(13), 1–21. doi:10.18637/jss.v076.i13.
- 633 Van Oosterhout, C., Hutchinson, W. F., Wills, D. P. M., and Shipley, P. (2004). micro-checker:  
634 Software for identifying and correcting genotyping errors in microsatellite data. *Molecular Ecology*  
635 *Notes* 4(3), 535–538. <https://doi.org/10.1111/j.1471-8286.2004.00684.x>
- 636 van Strien, M. J., Holderegger, R., and Van Heck, H. J. (2015). Isolation-by-distance in landscapes:  
637 Considerations for landscape genetics. *Heredity* 114(1), 27–37. <https://doi.org/10.1038/hdy.2014.62>



- 638 Verity, R., and Nichols, R. A. (2016). Estimating the Number of Subpopulations (K) in Structured  
639 Populations. *Genetics* 203(4), 1827-1839. <https://doi.org/10.1534/genetics.115.180992>.
- 640 Wagutu, G. K., Njeri, H. K., Fan, X. R., and Chen, Y. Y. (2020). Development and transferability of  
641 SSR primers in the wild rice *Zizania latifolia* (Poaceae). *Plant Science Journal* 38(1), In Press.
- 642 Wang, H. M., Wu, G. L., Jiang, S. L., Huang, Q. N., Feng, B. H., Hunag, C. G., et al. (2015). Genetic  
643 diversity of *Zizania latifolia* Griseb. from Poyang lake basin based on SSR and ISSR analysis.  
644 *Journal of Plant Genetic Resources* 16(1), 133–141.
- 645 Wang, I. J., and Bradburd, G. S. (2014). Isolation by environment. *Molecular Ecology* 23(23), 5649–  
646 5662. <https://doi.org/10.1111/mec.12938>
- 647 Wang, M. X., Zhang, H. L., Zhang, D. L., Qi, Y. W., Fan, Z. L., Li, D. Y., et al. (2008). Genetic  
648 structure of *Oryza rufipogon* Griff. In China. *Heredity* 101(6), 527–535.  
649 <https://doi.org/10.1038/hdy.2008.61>
- 650 Wang, T., Wang, Z., Xia, F., and Su, Y. (2016). Local adaptation to temperature and precipitation in  
651 naturally fragmented populations of *Cephalotaxus oliveri*, an endangered conifer endemic to China.  
652 *Scientific Reports* 6(1), 25031. <https://doi.org/10.1038/srep25031>
- 653 Wang, Y., Huang, L., and Fan, L. (2013). Main agronomic traits, domestication and breeding of Gu  
654 (*Zizania latifolia*). *Journal of Zhejiang University (Agriculture and Life Sciences)* 39(6) 629-  
655 635. DOI: ISSN: 1008-9209 CN: 33-1247/S.
- 656 Wang, Z., Wu, J., Madden, M., and Mao, D. (2012). China's Wetlands: Conservation Plans and  
657 Policy Impacts. *AMBIO* 41(7), 782–786. <https://doi.org/10.1007/s13280-012-0280-7>
- 658 Wright, S. (1943). Isolation by distance. *Genetics* 28 (2), 114–138.
- 659 Wright, S. (1969). *Evolution and the genetics of populations: The theory of gene frequencies*. The  
660 University of Chicago Press, Chicago, Illinois.
- 661 Wu, S., Yang, Q., and Zheng, D. (2003). Comparative study on eco-geographic regional systems  
662 between China and USA. *Acta Geographica Sinica* 58(5), 686-694.
- 663 Wu, Z., Xu, X., Zhang, J., Wiegleb, G., and Hou, H. (2019). Influence of environmental factors on  
664 the genetic variation of the aquatic macrophyte *Ranunculus subrigidus* on the Qinghai-Tibetan  
665 Plateau. *BMC Evolutionary Biology* 19(1), 228. <https://doi.org/10.1186/s12862-019-1559-0>
- 666 Xu, X. W., Wu, J. W., Qi, M. X., Lu, Q. X., Lee, P. F., Lutz, S., et al. (2015). Comparative  
667 phylogeography of the wild-rice genus *Zizania* (Poaceae) in eastern Asia and North America. *Am J*  
668 *Bot.* 102(2):239-47. doi: 10.3732/ajb.1400323.
- 669 Xu, X., Ke, W., Yu, X., Wen, J., and Ge, S. (2008). A preliminary study on population genetic  
670 structure and phylogeography of the wild and cultivated *Zizania latifolia* (Poaceae) based on *Adh1a*  
671 sequences. *Theoretical and Applied Genetics* 116(6), 835–843. <https://doi.org/10.1007/s00122-008-0717-3>  
672

- 673 Xu, X., Walters, C., Antolin, M. F., Alexander, M. L., Lutz, S., Ge, S., et al. (2010). Phylogeny and  
 674 biogeography of the eastern Asian–North American disjunct wild-rice genus (*Zizania* L.,  
 675 Poaceae). *Molecular Phylogenetics & Evolution* 55(3), 1008-1017.  
 676 doi:10.1016/j.ympev.2009.11.018.
- 677 Xu, Z., and Zhou, G. (2017). *Identification and Control of Common Weeds*. Dordrecht: Springer  
 678 Netherlands.
- 679 Yu, C., Likun, L., Xiuyun, L., Wanli, G., and Bao, L. (2006). Isolation and characterization of a set  
 680 of disease resistance-gene analogs (RGAs) from wild rice, *Zizania latifolia* Griseb. I. Introgression,  
 681 copy number lability, sequence change, and DNA methylation alteration in several rice–*Zizania*  
 682 introgression lines. *Genome* 49(2), 150-158. doi:10.1139/G05-097.
- 683 Zhao, Y., Song, Z., Zhong, L., Li, Q., Chen, J., and Rong, J. (2019). Inferring the Origin of  
 684 Cultivated *Zizania latifolia*, an Aquatic Vegetable of a Plant-Fungus Complex in the Yangtze River  
 685 Basin. *Frontiers in Plant Science* 10, 1406. <https://doi.org/10.3389/fpls.2019.01406>
- 686 Zhao, Y., Vrieling, K., Liao, H., Xiao, M., Zhu, Y., Rong, J., et al. (2013). Are habitat fragmentation,  
 687 local adaptation and isolation-by-distance driving population divergence in wild rice *Oryza*  
 688 *rufipogon*? *Molecular Ecology* 22(22), 5531–5547. <https://doi.org/10.1111/mec.12517>
- 689 Zhao, Y., Zhong, L., Zhou, K., Song, Z., Chen, J., and Rong, J. (2018). Seed characteristic variations  
 690 and genetic structure of wild *Zizania latifolia* along a latitudinal gradient in China: Implications for  
 691 neo-domestication as a grain crop. *AoB PLANTS* 10(6). <https://doi.org/10.1093/aobpla/ply072>
- 692 Zhou, S., Wang, C., Yang, H., Wang, G., Wang, Y., and Li, J. (2007). Growth of *Zizania latifolia* and  
 693 *Acorus calamus* in sewage and their effect on sewage purification. *Chin. J. App. Environ. Biol.* 13,  
 694 454e457 (in Chinese with English abstract).

## 695 Tables

696 **Table 1.** Geographical information and summary measures of clonal diversity and genetic variation  
 697 for each of the 28 wild populations of *Zizania latifolia* along the five latitudinal regions starting from  
 698 the north towards the south.

| Population | Location                              | Regions | <i>N</i> | <i>G</i> | <i>N<sub>a</sub></i> | <i>N<sub>e</sub></i> | <i>H<sub>O</sub></i> | <i>H<sub>E</sub></i> | <i>F<sub>IS</sub></i> |
|------------|---------------------------------------|---------|----------|----------|----------------------|----------------------|----------------------|----------------------|-----------------------|
| BS         | Baihilazi, Heilongjiang Province      |         | 22       | 21       | 1.880                | 1.509                | 0.303                | 0.261                | -0.135**              |
| XXT        | Xiaoxintun, Heilongjiang Province     |         | 21       | 21       | 1.560                | 1.398                | 0.219                | 0.183                | -0.172**              |
| HDY        | Hadayan, Heilongjiang Province        |         | 20       | 16       | 1.400                | 1.202                | 0.113                | 0.111                | 0.021                 |
| KEB        | Kuerbin River, Heilongjiang Province  | I       | 22       | 19       | 1.480                | 1.223                | 0.149                | 0.138                | -0.057                |
| LQQ        | Lanqitun, Heilongjiang Province       |         | 20       | 19       | 1.920                | 1.549                | 0.282                | 0.297                | 0.077                 |
| HW         | Hongwei, Heilongjiang Province        |         | 20       | 19       | 1.920                | 1.684                | 0.278                | 0.286                | 0.055                 |
| YLZ        | Yihaoyuliangzi, Heilongjiang Province |         | 20       | 18       | 1.920                | 1.514                | 0.178                | 0.190                | 0.091                 |
| JH         | Jinhua, Liaoning Province             |         | 20       | 20       | 2.160                | 1.627                | 0.292                | 0.280                | -0.017                |
| HR         | Huanren, Liaoning Province            |         | 20       | 17       | 1.640                | 1.386                | 0.198                | 0.175                | -0.100                |
| ZD         | Zhangdang, Liaoning Province          | II      | 20       | 20       | 1.560                | 1.358                | 0.204                | 0.175                | -0.138**              |
| DG         | Donggang, Liaoning Province           |         | 20       | 20       | 1.800                | 1.361                | 0.234                | 0.193                | -0.186***             |
| LZX        | Liaozhong, Liaoning Province          |         | 20       | 20       | 3.320                | 2.262                | 0.448                | 0.434                | -0.007                |

|      |                                  |     |        |        |       |       |       |       |           |
|------|----------------------------------|-----|--------|--------|-------|-------|-------|-------|-----------|
| HXD  | Huanxiangdian, Shandong Province |     | 20     | 20     | 2.040 | 1.548 | 0.316 | 0.288 | -0.071    |
| DP   | Dongpinghu, Shandong Province    |     | 20     | 20     | 3.120 | 2.188 | 0.470 | 0.436 | -0.053    |
| LQ   | Luqiao, Shandong Province        | III | 20     | 20     | 3.200 | 2.169 | 0.442 | 0.436 | 0.012     |
| MK   | Mankou, Shandong Province        |     | 20     | 20     | 3.200 | 2.104 | 0.440 | 0.428 | -0.003    |
| CH   | Changhu Lake, Hubei Province     |     | 21     | 21     | 4.000 | 2.874 | 0.488 | 0.484 | 0.016     |
| DT   | Dongting Lake, Hunan Province    |     | 21     | 21     | 3.480 | 2.468 | 0.450 | 0.475 | 0.077**   |
| HH   | Honghu Lake, Hubei Province      |     | 20     | 20     | 3.600 | 2.498 | 0.470 | 0.464 | 0.012     |
| LZ   | Liangzi Lake, Hubei Province     | IV  | 21     | 21     | 3.320 | 2.296 | 0.451 | 0.456 | 0.034     |
| LG   | Longgan Lake, Hubei Province     |     | 21     | 21     | 1.560 | 1.275 | 0.200 | 0.160 | -0.224*** |
| SJ   | Shengjin Lake, Anhui Province    |     | 21     | 21     | 3.600 | 2.394 | 0.430 | 0.468 | 0.104***  |
| BD   | Baidang Lake, Anhui Province     |     | 22     | 22     | 3.280 | 2.169 | 0.476 | 0.458 | -0.017    |
| NM   | Nama, Guangxi Province           |     | 21     | 19     | 1.600 | 1.302 | 0.173 | 0.165 | -0.020    |
| FC   | Fangchenggang, Guangxi Province  |     | 21     | 21     | 1.600 | 1.405 | 0.236 | 0.205 | -0.130*   |
| BL   | Beiliu City, Guangxi Province    | V   | 23     | 22     | 1.560 | 1.294 | 0.175 | 0.150 | -0.138**  |
| WC   | Wuchuan City, Guangdong Province |     | 21     | 21     | 1.800 | 1.459 | 0.223 | 0.216 | -0.008    |
| DC   | Dongcheng, Guangdong Province    |     | 20     | 20     | 1.640 | 1.292 | 0.166 | 0.157 | -0.029    |
| Mean |                                  |     | 20.643 | 20.000 | 2.327 | 1.743 | 0.304 | 0.292 | -0.036    |

Note:  $N$ , number of individual plants;  $N_a$ , observed alleles number;  $N_e$ , effective allele number;  $H_o$ , observed heterozygosity;  $H_E$ , expected heterozygosity;  $F_{IS}$ , inbreeding coefficient; \* $P < 0.05$ ; \*\* $P < 0.01$ ; \*\*\* $P < 0.001$ .

699  
700  
701  
702

**Table 2.** Genetic diversity found at 25 microsatellite loci in *Zizania latifolia*

| Locus   | $A$    | $H_o$ | $H_E$ | $F_{ST}$ | $F_{IS}$ | $Nm$  |
|---------|--------|-------|-------|----------|----------|-------|
| ZM4     | 7      | 0.278 | 0.304 | 0.602    | 0.111    | 0.060 |
| ZM25    | 6      | 0.192 | 0.183 | 0.762    | -0.022   | 0.045 |
| ZM26    | 9      | 0.281 | 0.278 | 0.641    | 0.016    | 0.058 |
| ZM28    | 4      | 0.114 | 0.114 | 0.818    | 0.026    | 0.037 |
| ZM35    | 12     | 0.459 | 0.463 | 0.451    | 0.034    | 0.062 |
| ZM44    | 11     | 0.495 | 0.510 | 0.386    | 0.050    | 0.059 |
| RM14233 | 12     | 0.379 | 0.339 | 0.599    | -0.090   | 0.060 |
| RM20118 | 6      | 0.410 | 0.342 | 0.556    | -0.170   | 0.062 |
| RM28090 | 7      | 0.529 | 0.435 | 0.431    | -0.197   | 0.061 |
| Zt1     | 7      | 0.290 | 0.250 | 0.692    | -0.130   | 0.053 |
| Zt23    | 6      | 0.187 | 0.187 | 0.718    | 0.027    | 0.051 |
| ZL1     | 30     | 0.706 | 0.607 | 0.292    | -0.136   | 0.052 |
| ZL3     | 29     | 0.413 | 0.480 | 0.476    | 0.167    | 0.062 |
| ZL4     | 28     | 0.396 | 0.444 | 0.512    | 0.131    | 0.062 |
| ZL5     | 28     | 0.416 | 0.454 | 0.511    | 0.108    | 0.062 |
| ZL9     | 5      | 0.211 | 0.212 | 0.560    | 0.095    | 0.062 |
| ZL10    | 7      | 0.276 | 0.277 | 0.510    | 0.028    | 0.062 |
| ZL31    | 7      | 0.346 | 0.305 | 0.427    | -0.109   | 0.061 |
| ZL32    | 8      | 0.315 | 0.291 | 0.482    | -0.056   | 0.062 |
| ZL36    | 5      | 0.213 | 0.193 | 0.739    | -0.085   | 0.048 |
| ZL42    | 5      | 0.105 | 0.110 | 0.445    | 0.079    | 0.062 |
| ZL43    | 4      | 0.117 | 0.115 | 0.432    | 0.014    | 0.061 |
| ZL55    | 4      | 0.072 | 0.072 | 0.875    | 0.016    | 0.027 |
| ZL56    | 5      | 0.344 | 0.273 | 0.649    | -0.236   | 0.057 |
| ZL57    | 4      | 0.067 | 0.059 | 0.908    | -0.125   | 0.021 |
| Mean    | 10.240 | 0.304 | 0.292 | 0.579    | -0.016   | 0.061 |

Note:  $A$ , average number of alleles per locus;  $H_E$ , expected heterozygosity;  $H_o$ , observed heterozygosity;  $F_{ST}$ , coefficient of genetic differentiation;  $Nm$ , gene flow

703  
704

705 **Table 3.** AMOVA design and results (average over 25 loci)

| Source of variation     | d. f. | Sum of squares | Variance components | Percentage variation | Statistics         | <i>P</i> |
|-------------------------|-------|----------------|---------------------|----------------------|--------------------|----------|
| <u>Among population</u> |       |                |                     |                      |                    |          |
| Among populations       | 27    | 5718.302       | 5.20096             | 57.88                |                    | <0.001   |
| Within populations      | 1092  | 133.310        | 3.78508             | 42.12                | $\Phi_{pt}=0.5787$ | <0.001   |
| <u>Among clusters</u>   |       |                |                     |                      |                    |          |
| Among clusters          | 4     | 391.365        | 3.50502             | 36.44                |                    | <0.001   |
| Within clusters         | 23    | 2226.957       | 2.32734             | 24.20                | $\Phi_{pt}=0.6064$ | <0.001   |

706

707

708

**Table 4.** Reciprocal causal modeling, partial and simple Mantel results for IBD, IBR and IBE

|                                                  |     | IBD            | IBR            | IBE           |
|--------------------------------------------------|-----|----------------|----------------|---------------|
|                                                  |     | Geo            | Res            | Env           |
| I: Reciprocal causal modeling matrix             |     |                |                |               |
| IBD                                              | Geo | 0              | 0.0851         | <b>0.4961</b> |
| IBR                                              | Res | -0.0851        | 0              | <b>0.0392</b> |
| IBE                                              | Env | <b>-0.4961</b> | <b>-0.0392</b> | <b>0</b>      |
| II: Simple and Partial Mantel correlation matrix |     |                |                |               |
| IBD                                              | Geo | 0.5830***      | 0.2684***      | 0.3063***     |
| IBR                                              | Res | 0.1833**       | 0.6051***      | 0.2724***     |
| IBE                                              | Env | -0.1898        | 0.2332***      | 0.6160***     |

709

710

711

712

713

714

715

716

Note: IBD, isolation by distance; IBR, isolation by resistance; IBE, isolation by environment; Geo, geographic distance; Res, resistance distance; Env, environmental distance.

(I) Reciprocal causal modeling matrix; columns indicate test model and rows indicate alternative models. Each value represents the relative support of the test model

(II) Simple and Partial Mantel correlation matrix. Columns indicates test model and rows indicate partialled-out models. Values are r values for correlations, diagonal values are the simple Mantel test r of a variable. \**P* < 0.05; \*\**P* < 0.01; \*\*\**P* < 0.001.

717

718

**Table 5.** Generalized linear model for the influence of environmental variables on genetic diversity measures. Values are significant at *P*-values  $\leq 0.05$

| Independent variables | Dependent variables |              |               |
|-----------------------|---------------------|--------------|---------------|
|                       | $H_E$               | $H_O$        | $N_a$         |
| bio_4                 | –                   | –            | 0.012         |
| <b>bio_5</b>          | <b>0.024</b>        | <b>0.017</b> | –             |
| bio_10                | –                   | 0.046        | 0.030         |
| bio_14                | –                   | –            | 0.032         |
| <b>bio_15</b>         | <b>0.032</b>        | –            | <b>0.0090</b> |
| bio_17                | –                   | –            | 0.020         |
| bio_19                | –                   | –            | 0.043         |

719

720 **Figures**

721

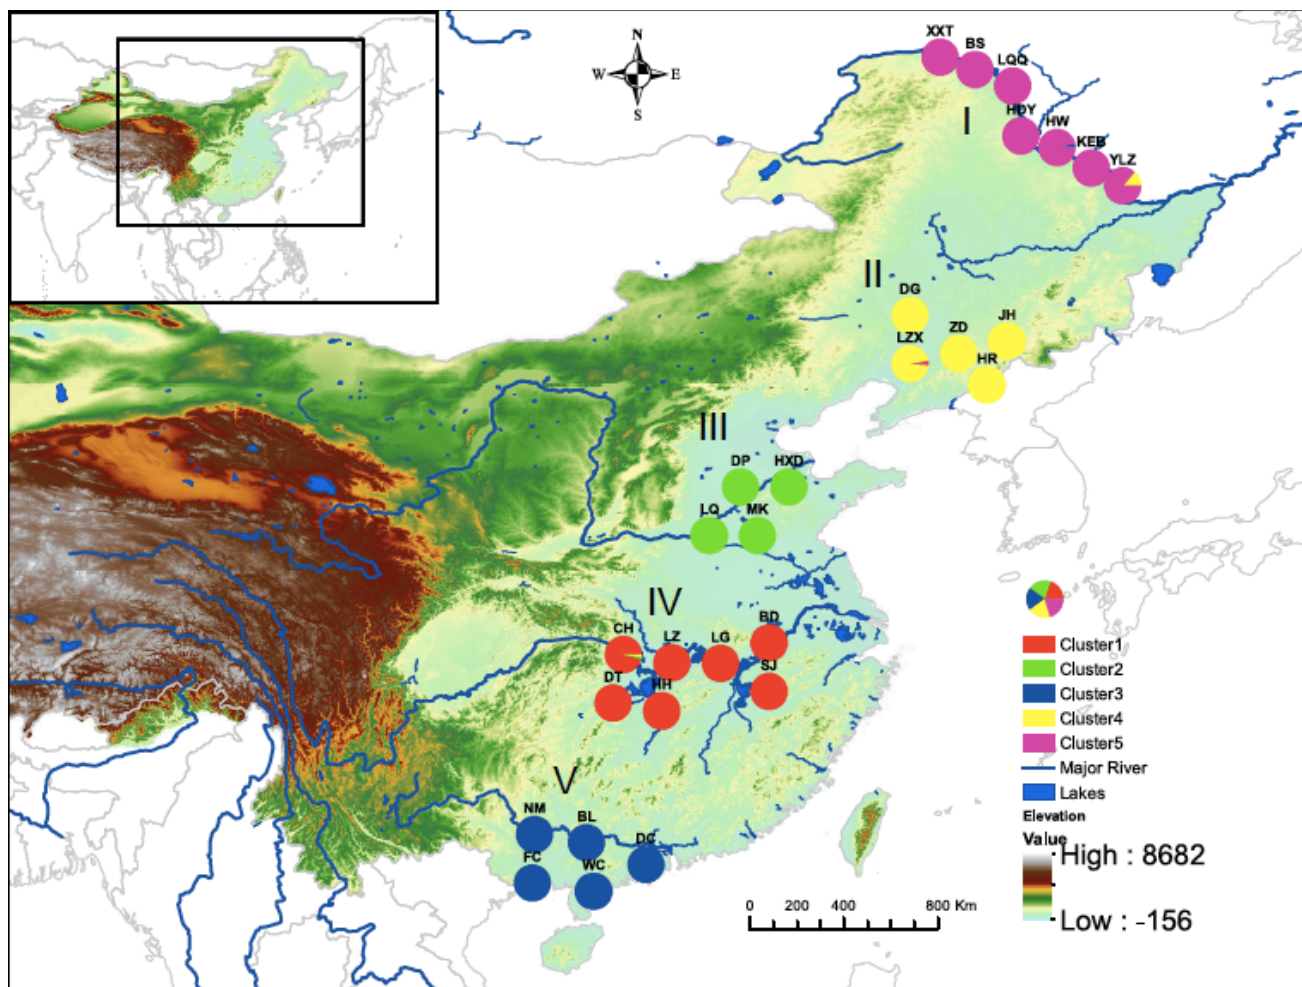

722

723

724 **Figure 1:** Geographical distribution of wild rice samples across the five (I to V) latitudinal regions in  
725 China and their respective genetic clusters each denoted by a different color.

726

727

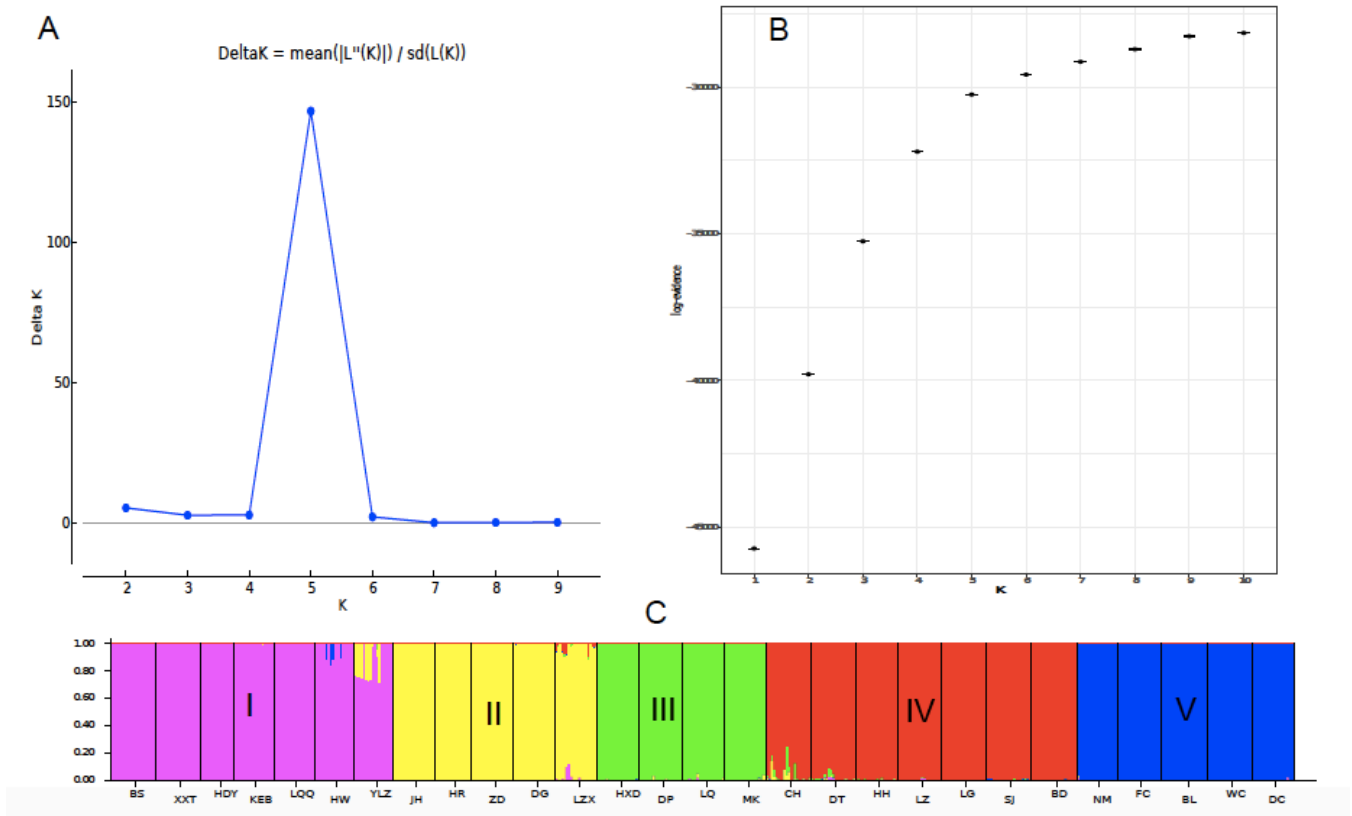

728

729

730

731

732

733

**Figure 2:** Bayesian analysis of population structure (STRUCTURE) for  $K = 5$  inferred by DISTRUCT as calculated by: **(A)**, Evanno's delta  $K$  and; **(B)**, log-evidence in thermodynamic integration. **(C)** STRUCTURE composition of individuals, with each of the clusters corresponding to the five latitudinal regions and color-coded similar to Figure 1.

734

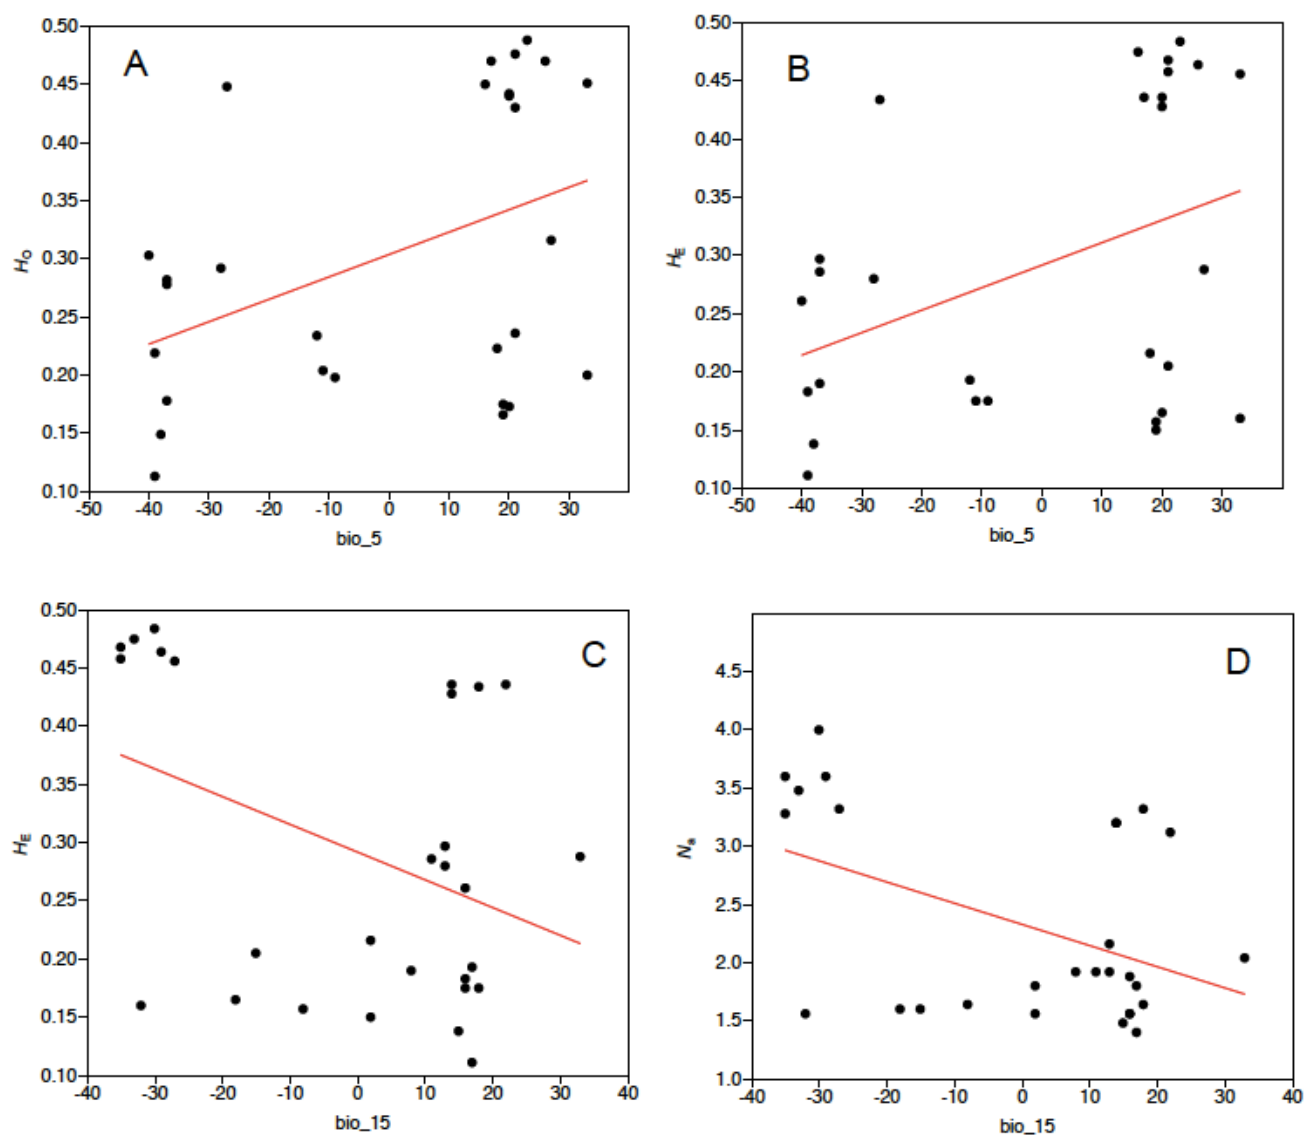

735

736 **Figure 3:** Significant relationships between genetic diversity estimators and the two most important  
737 environmental variables, based on variance inflation factor analysis. **(A)**  $H_O$ , observed  
738 heterozygosity; **(B and C)**  $H_E$ , expected heterozygosity; **(D)**  $N_a$ , number of alleles per population.  
739  $bio\_5$ ; Maximum temperature of warmest month,  $bio\_15$ ; precipitation seasonality.

740
